# Supplementary material
Source: publisher figshare collection journal article supplement (https://diabetesjournals.figshare.com/articles/dataset/_/11980965)

Suppl Figure 1

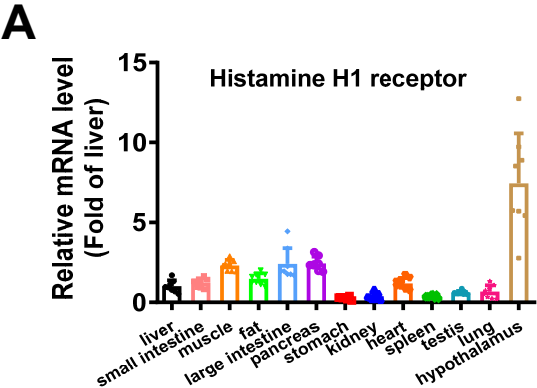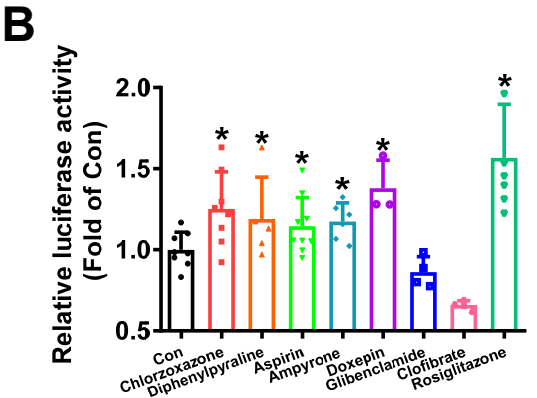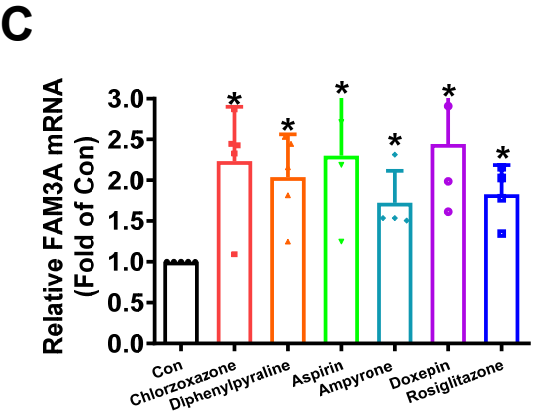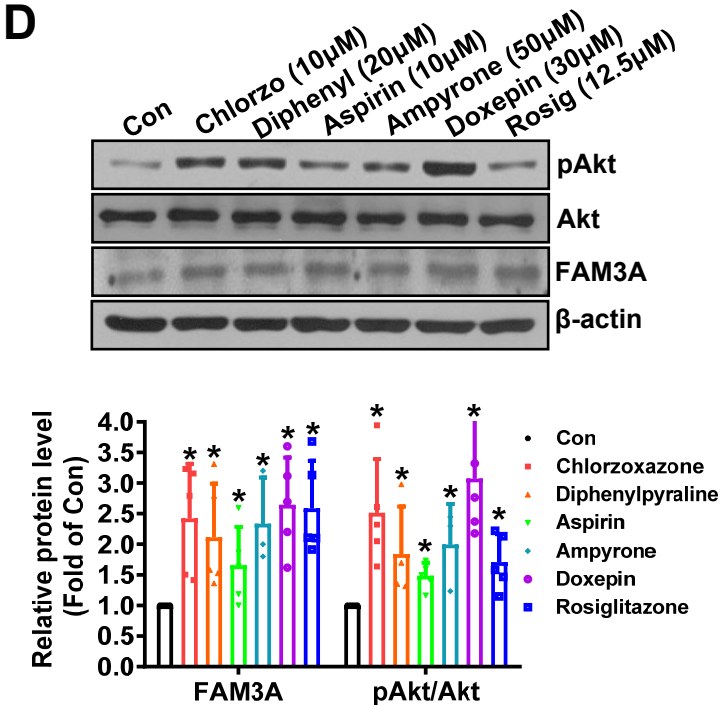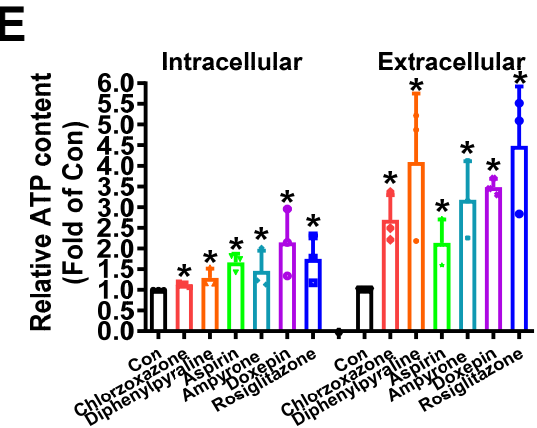

Suppl Figure 2

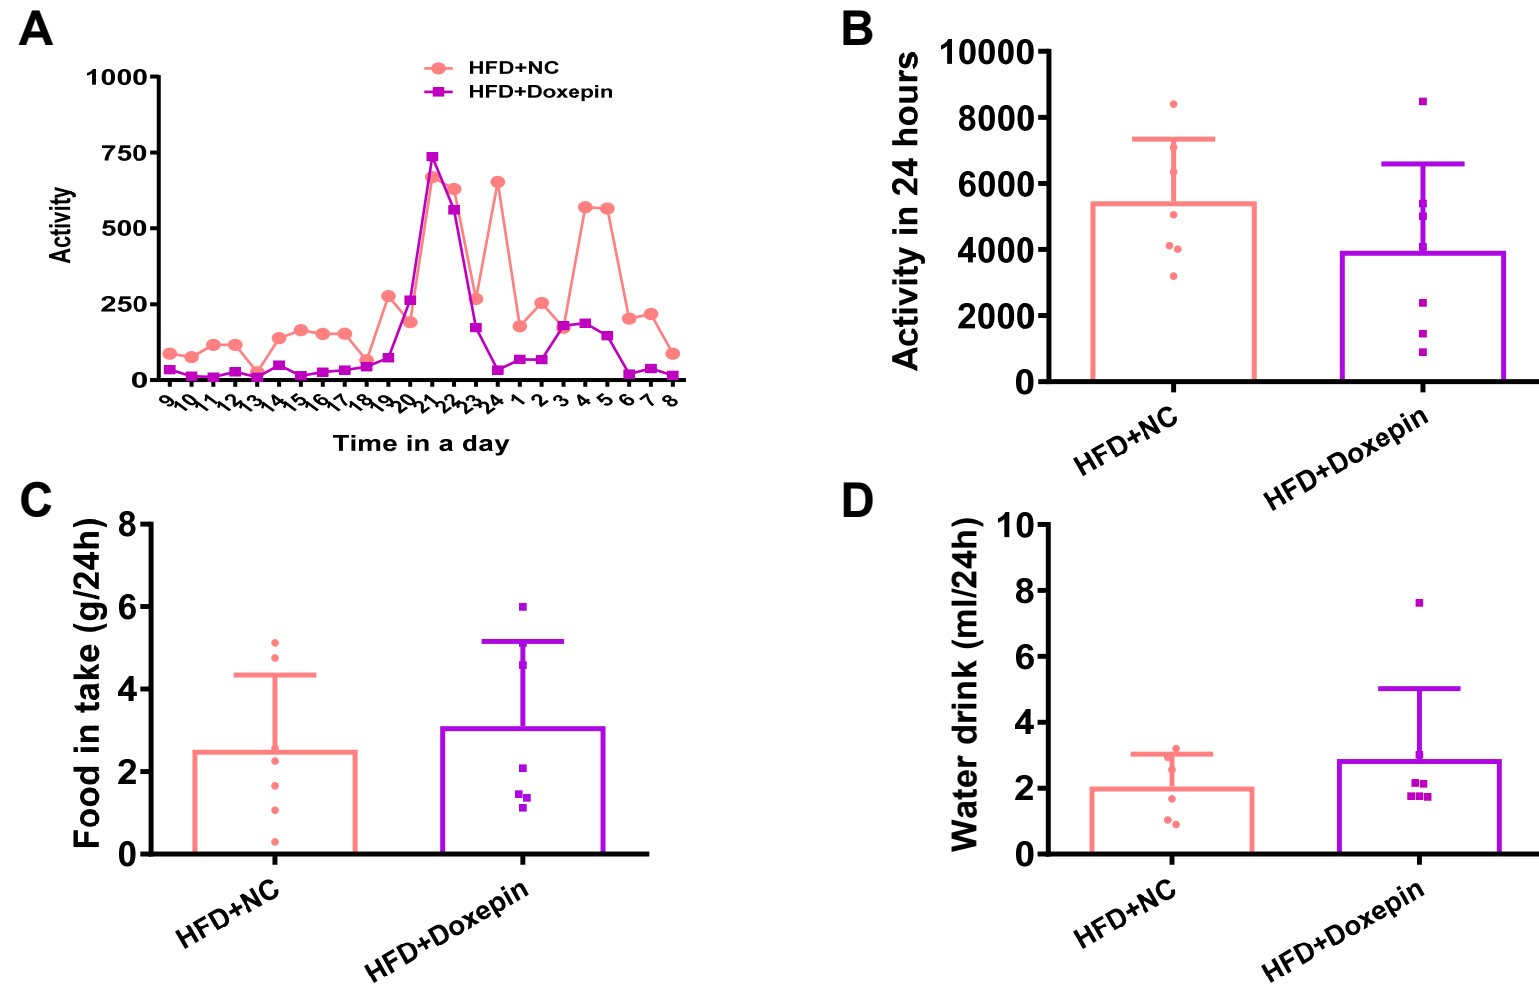

Suppl Figure 3

**A**

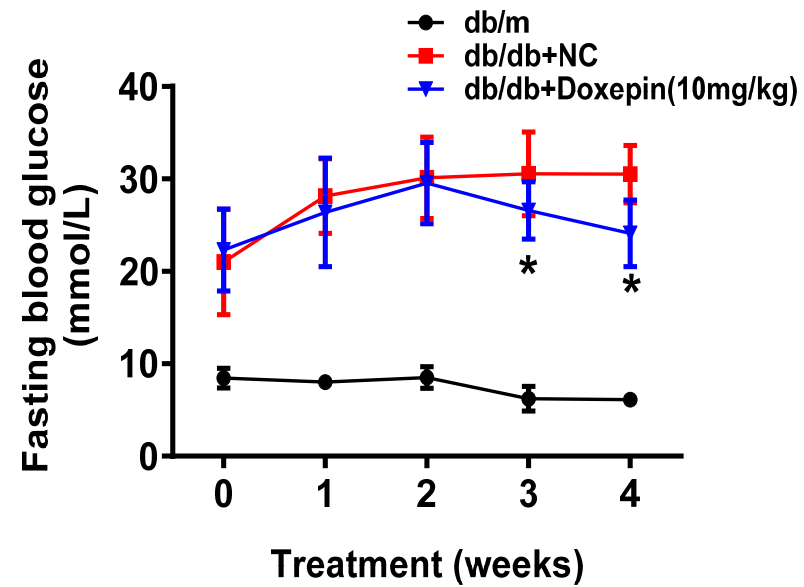

**B**

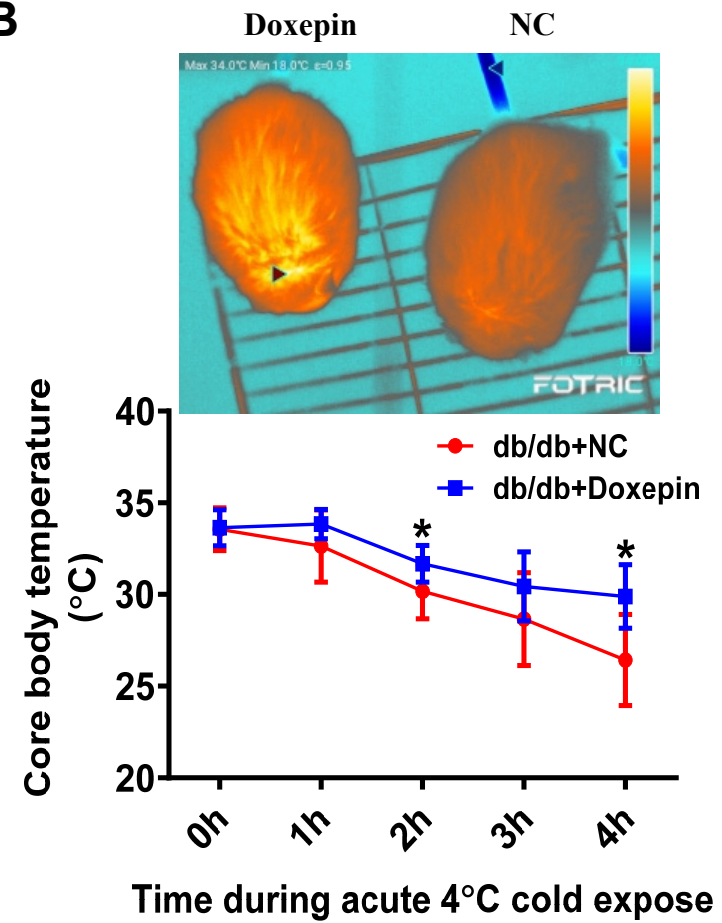

Suppl Figure 4

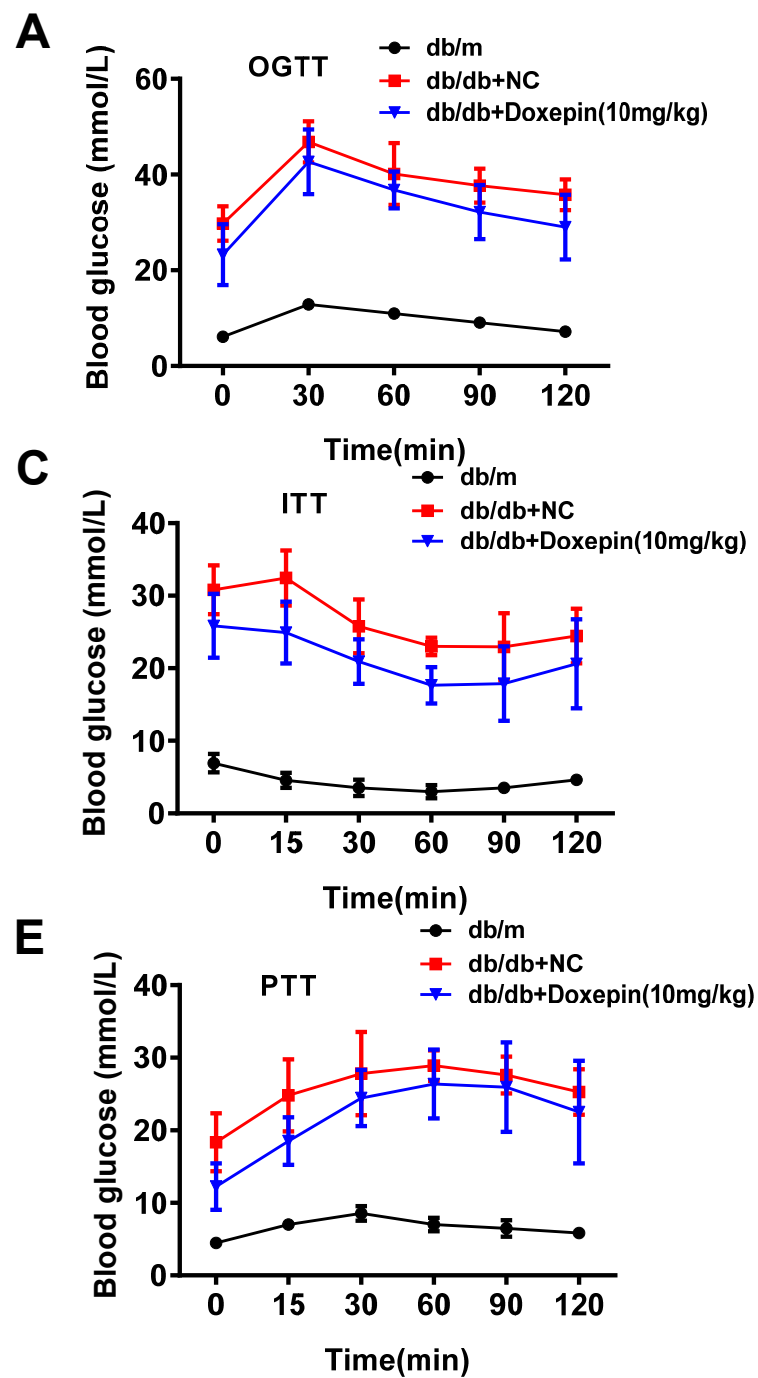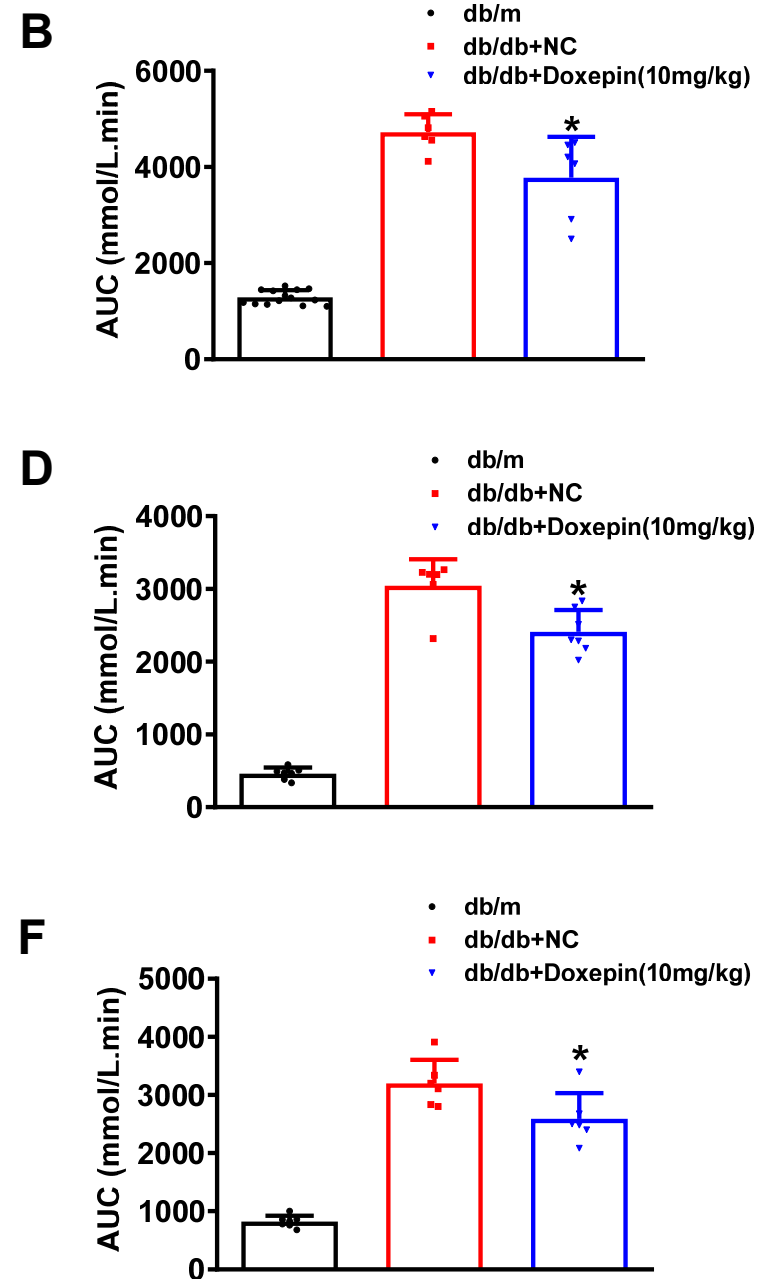

Suppl Figure 5

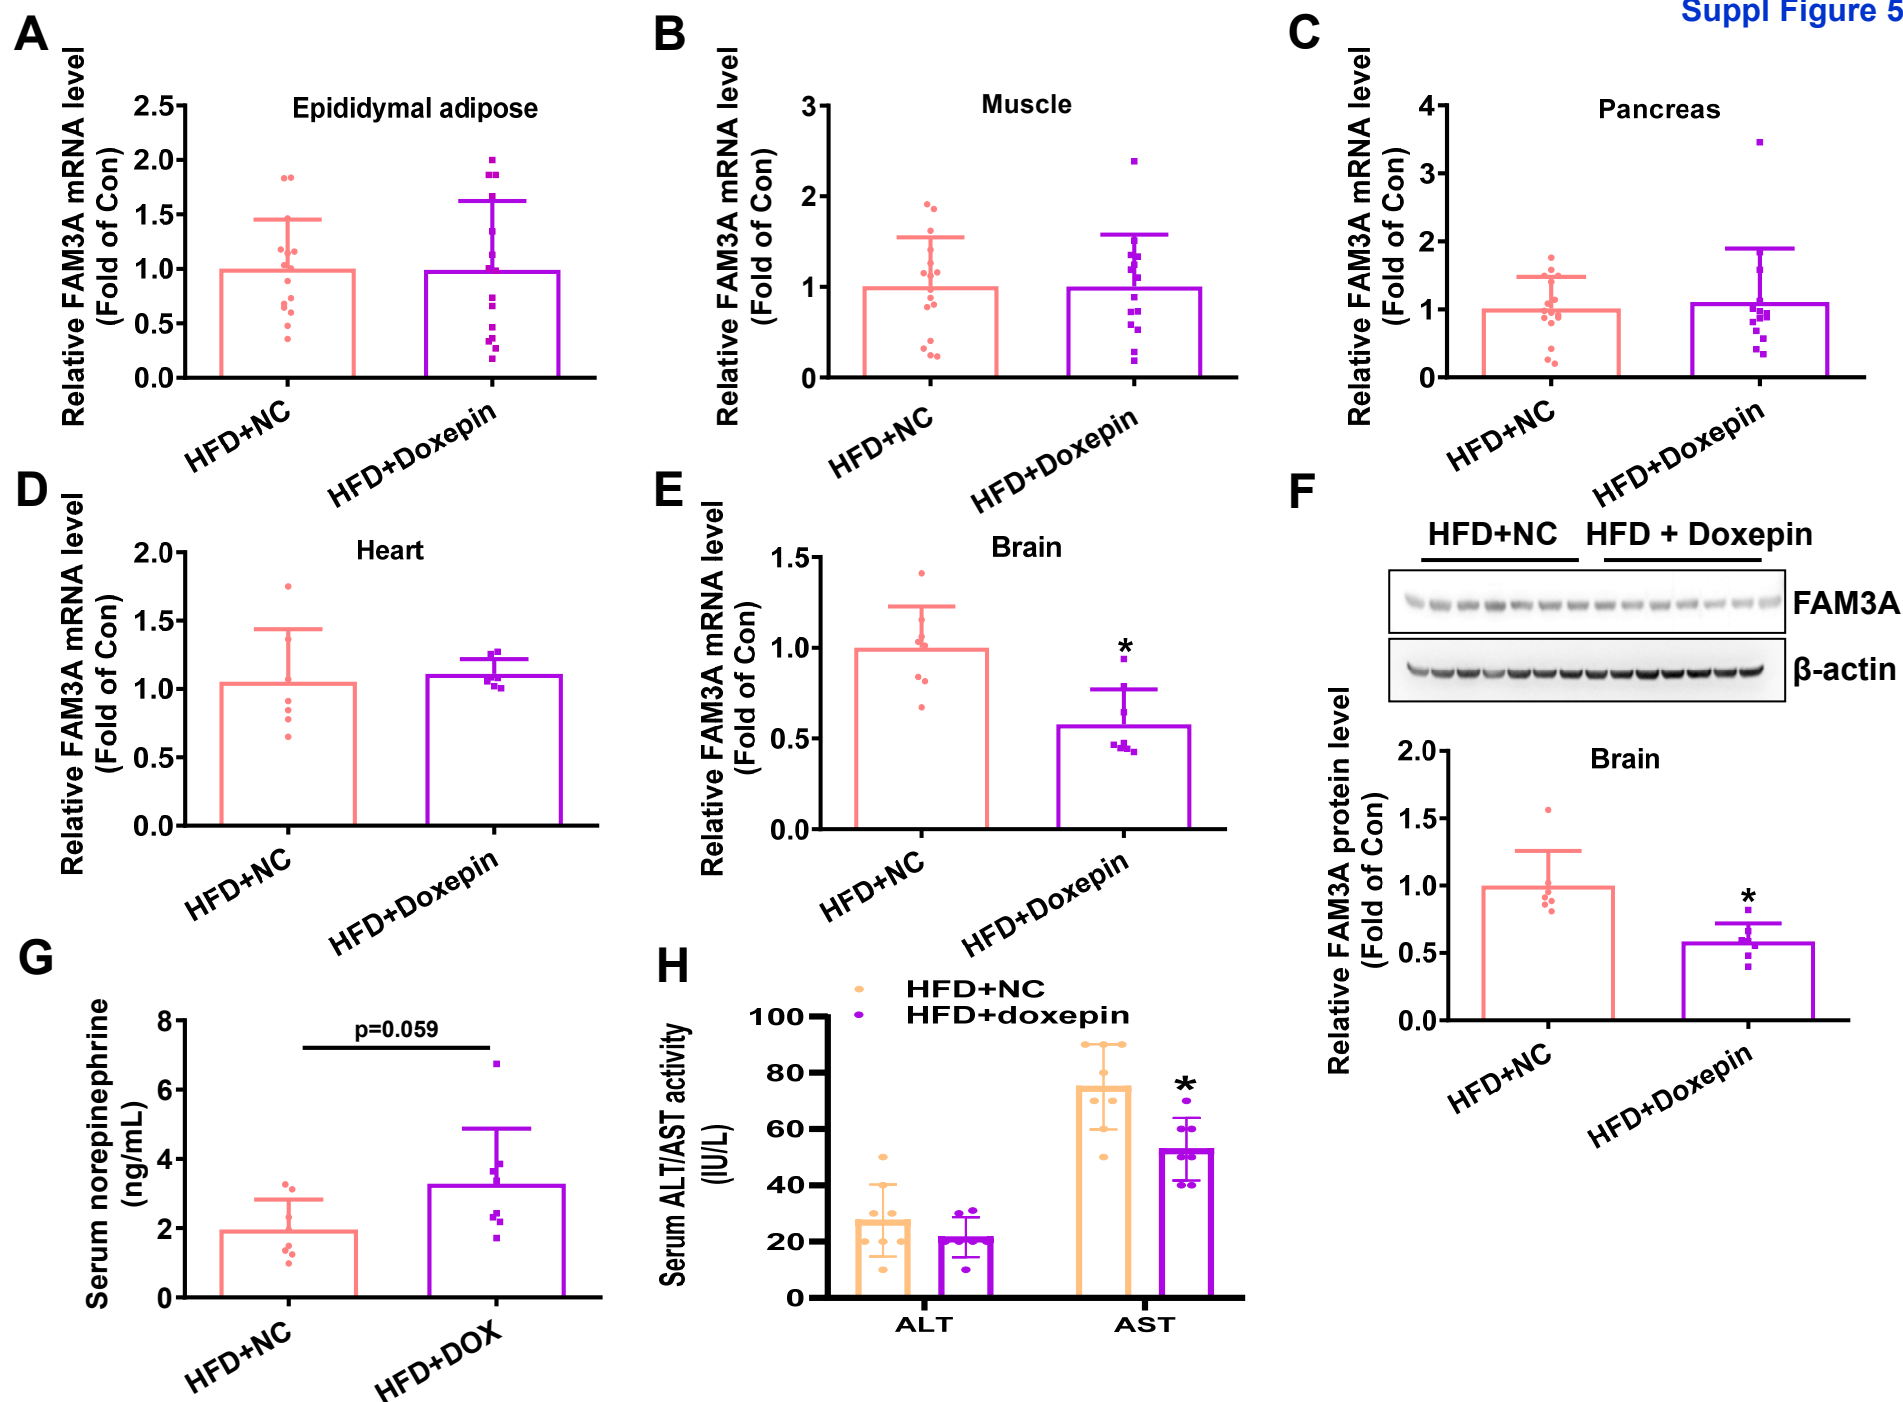

### Suppl Figure 6

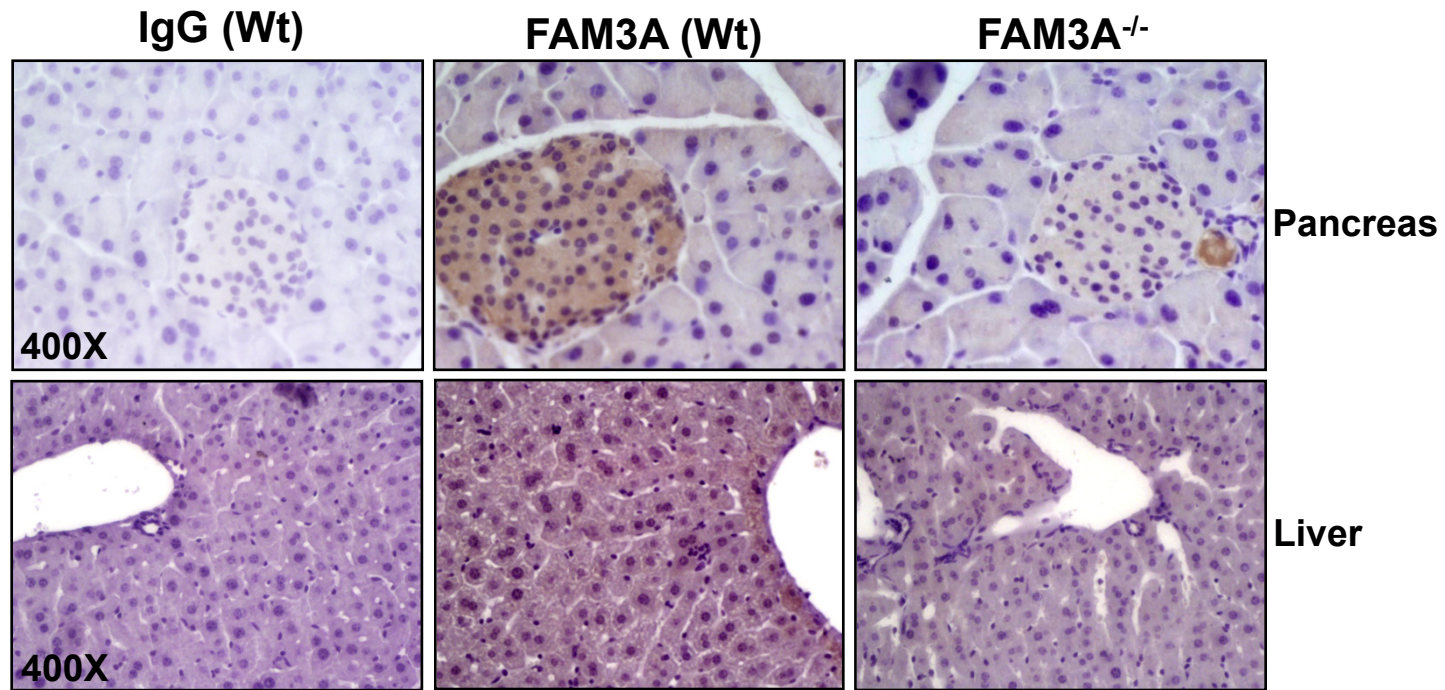

Suppl Figure 7

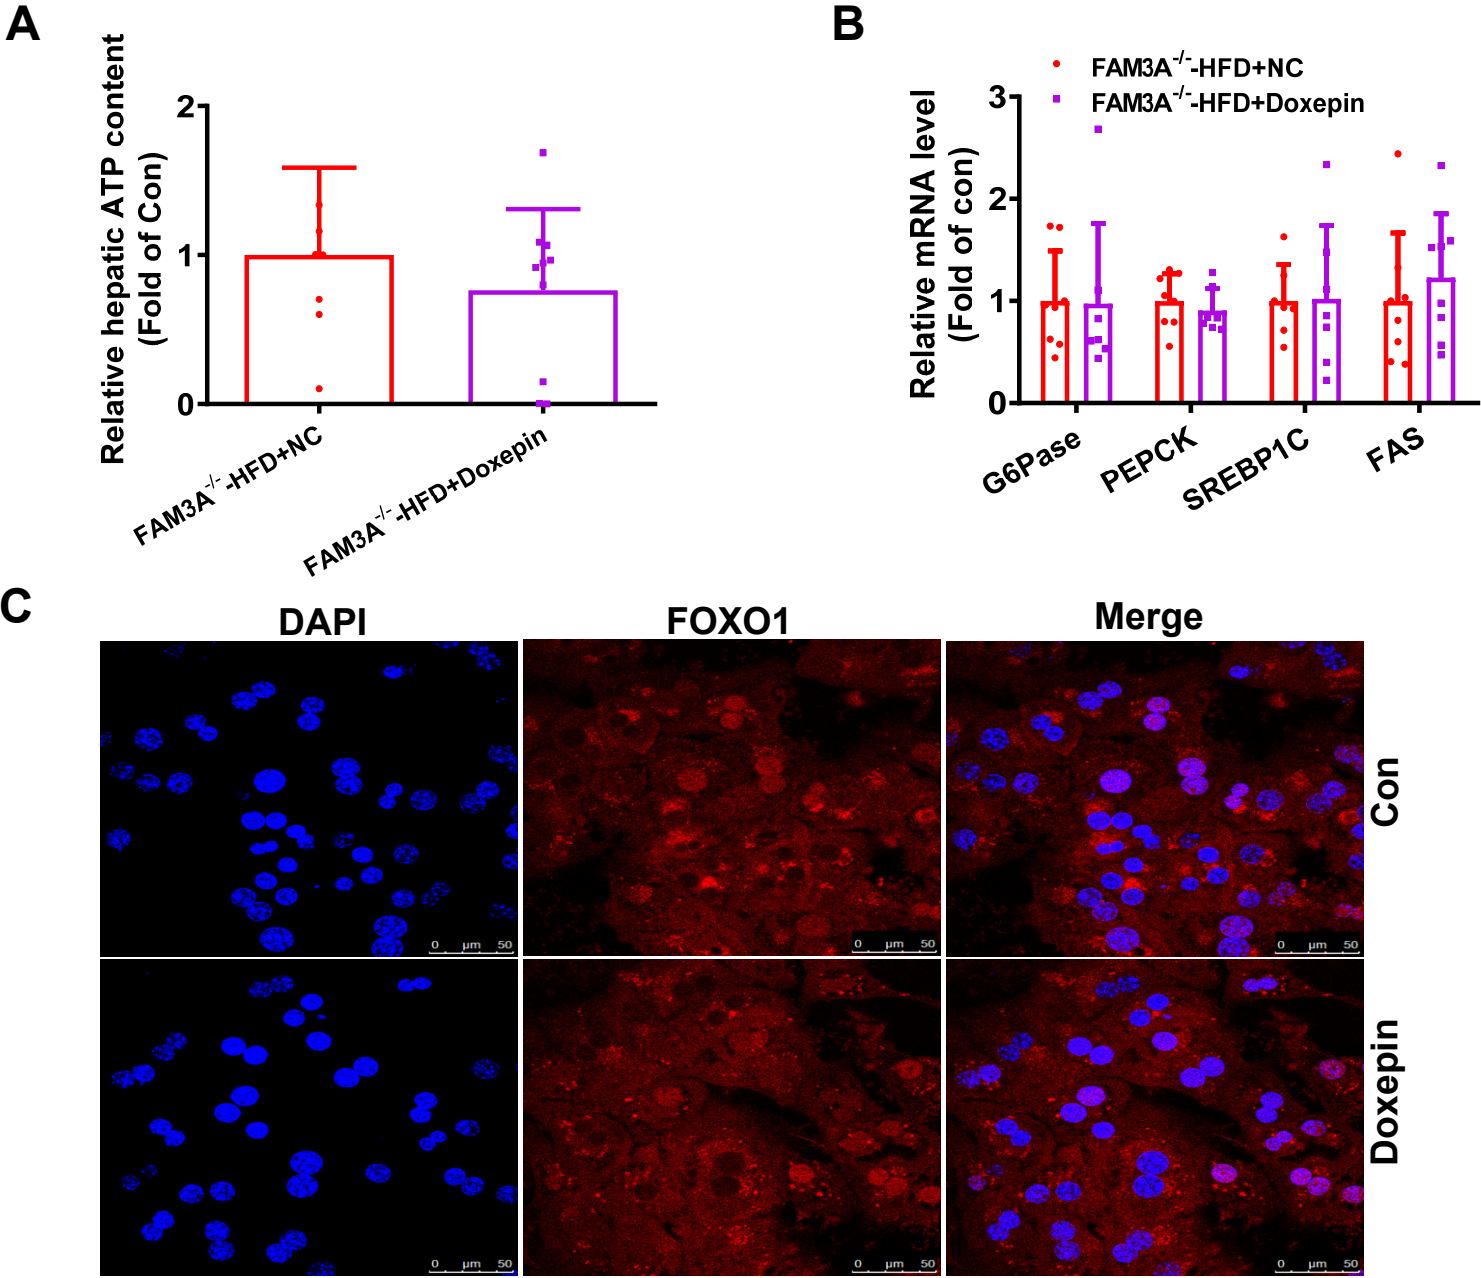

Suppl Figure 8

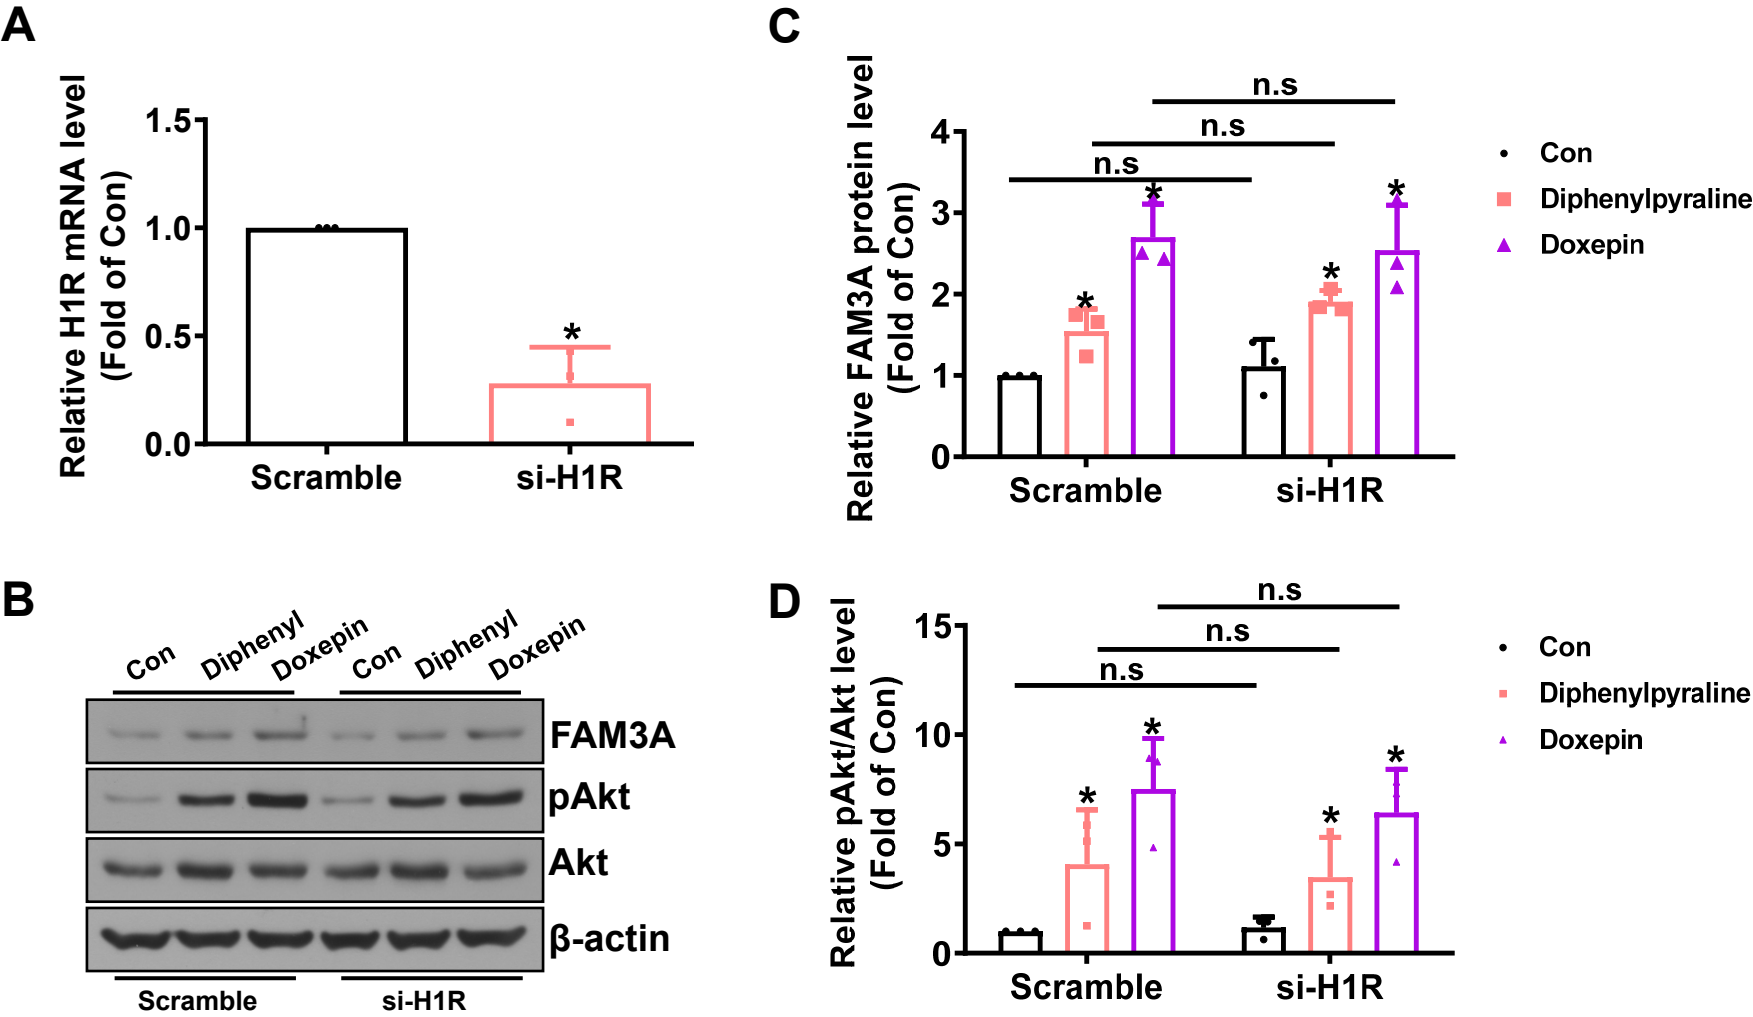

Suppl Figure 9

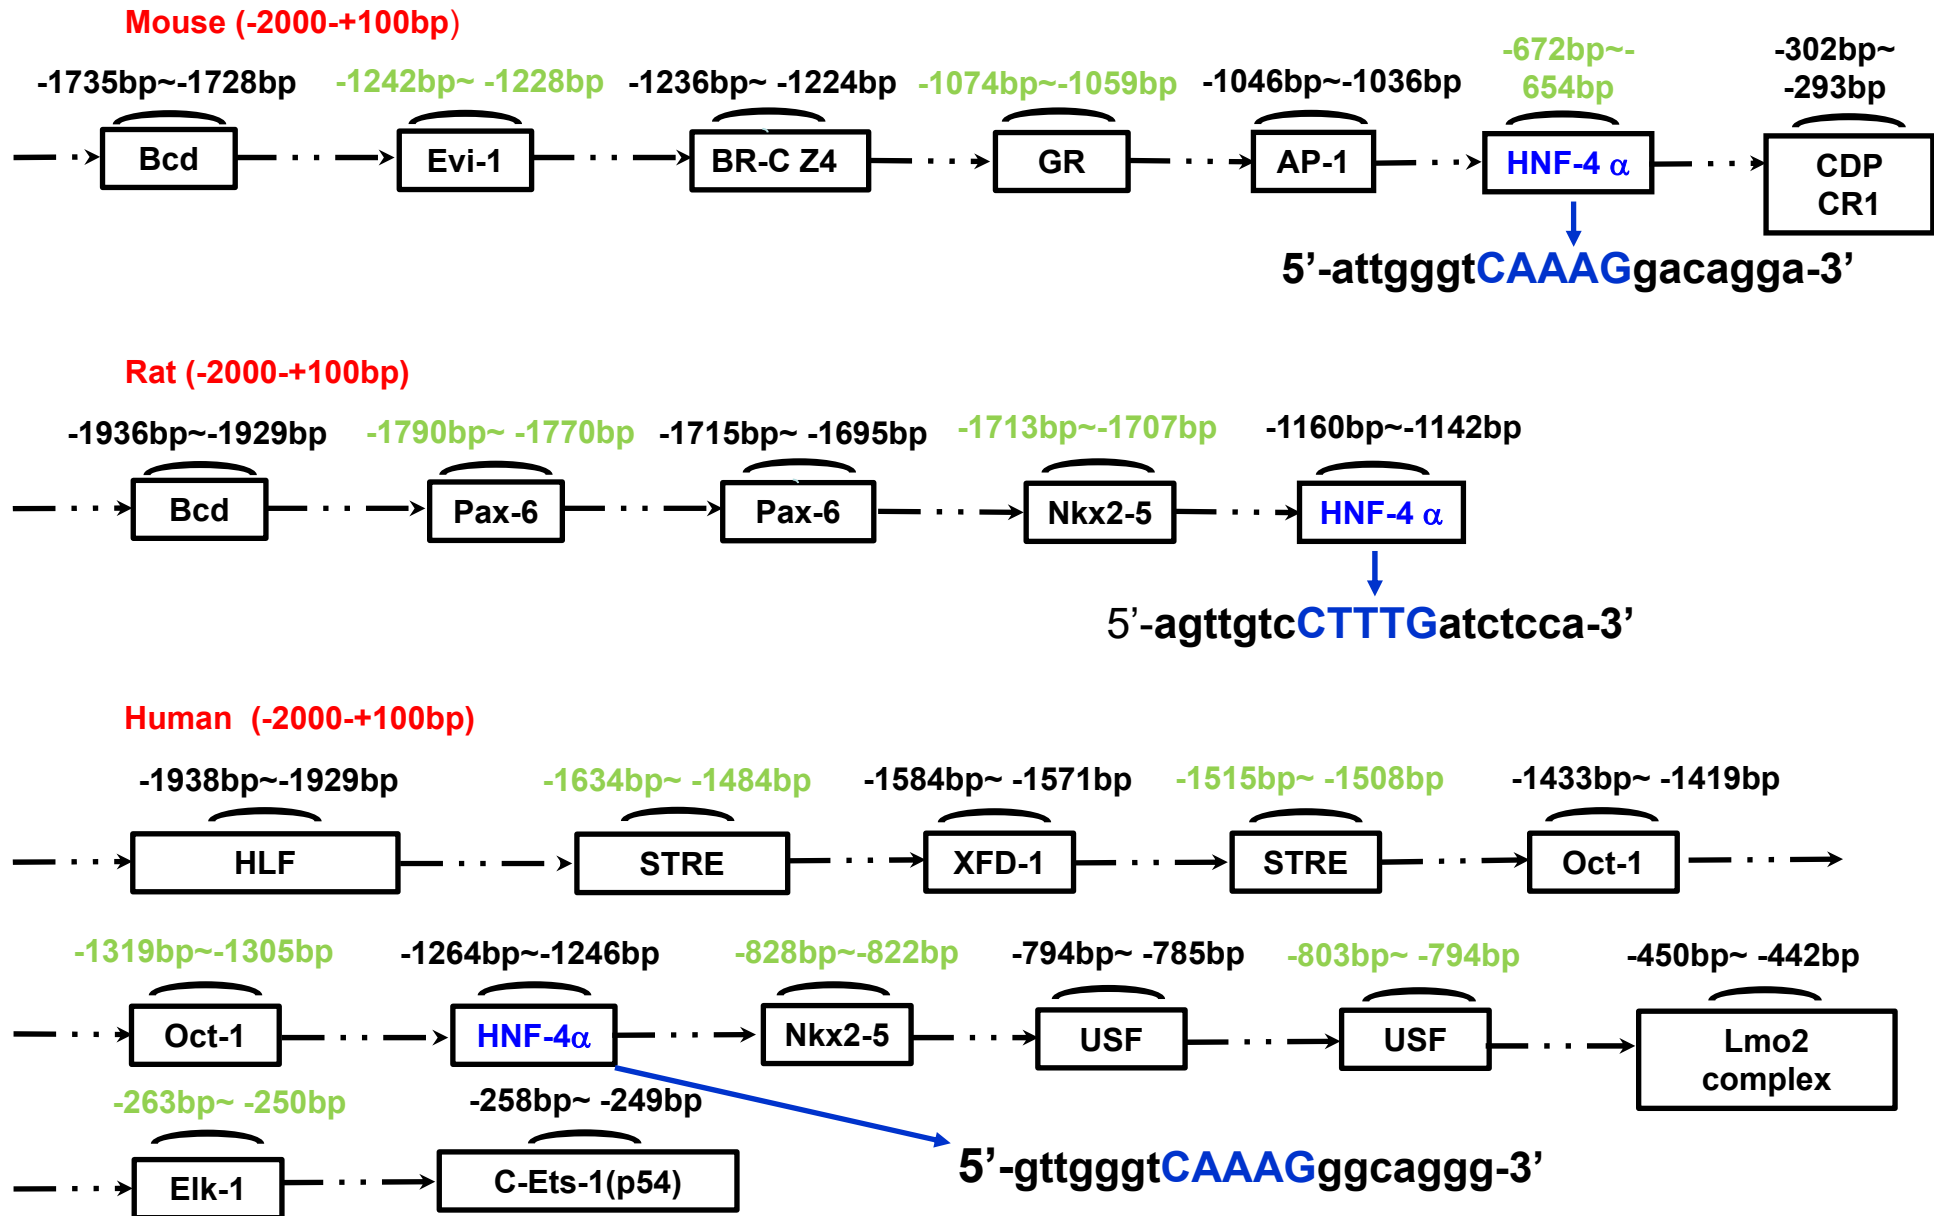

Suppl Figure 10

**A**

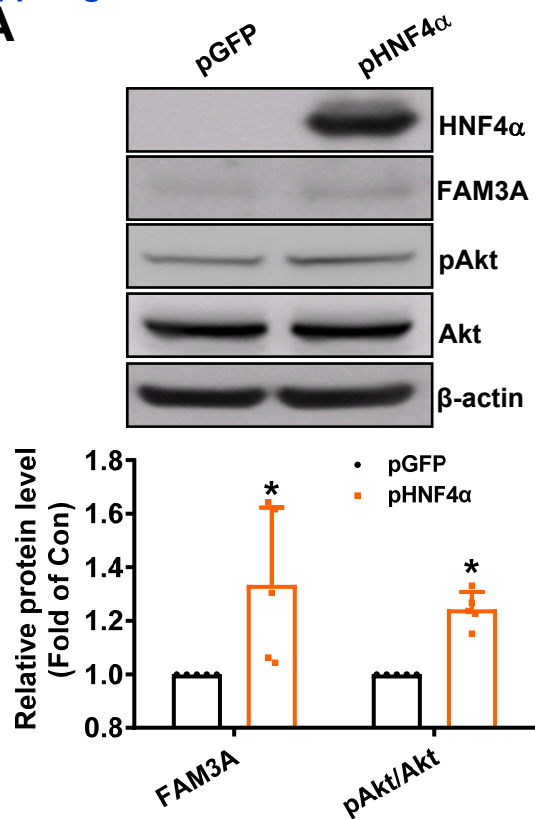

**B**

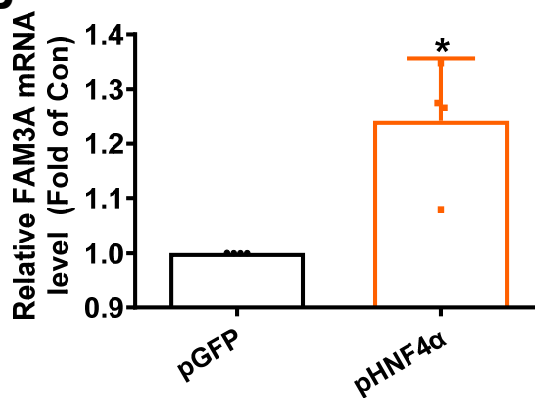

**C**

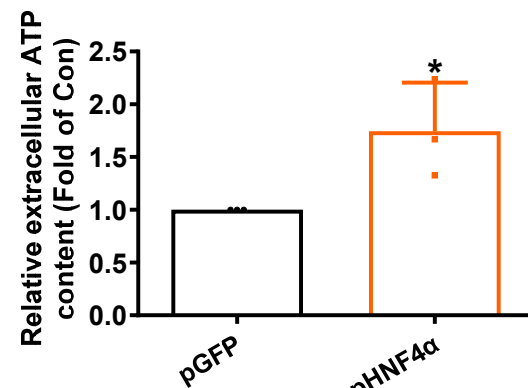

**D**

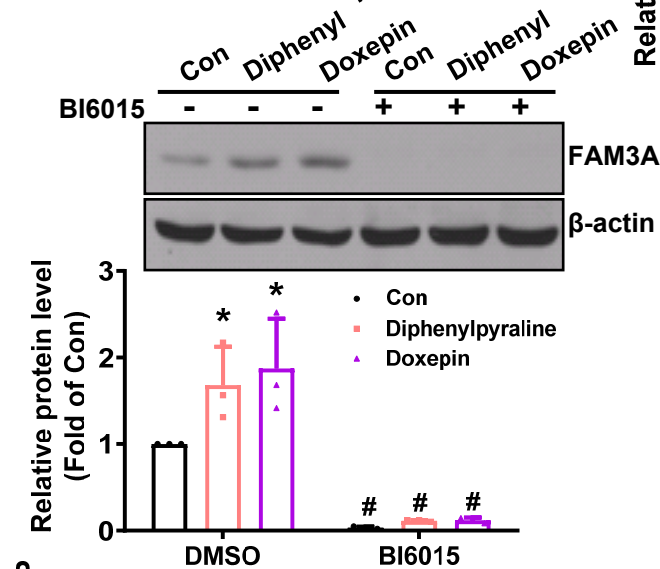

**E**

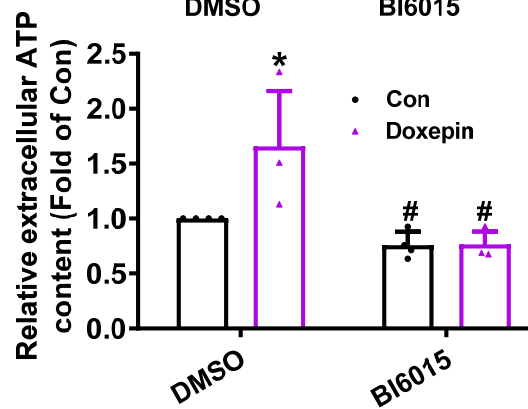

**F**

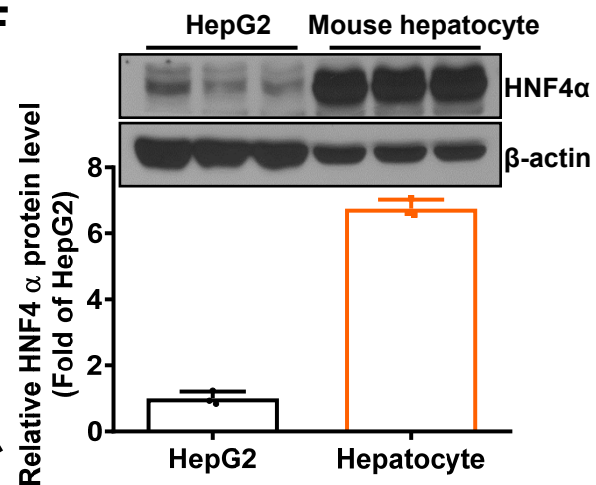

Suppl Figure 11

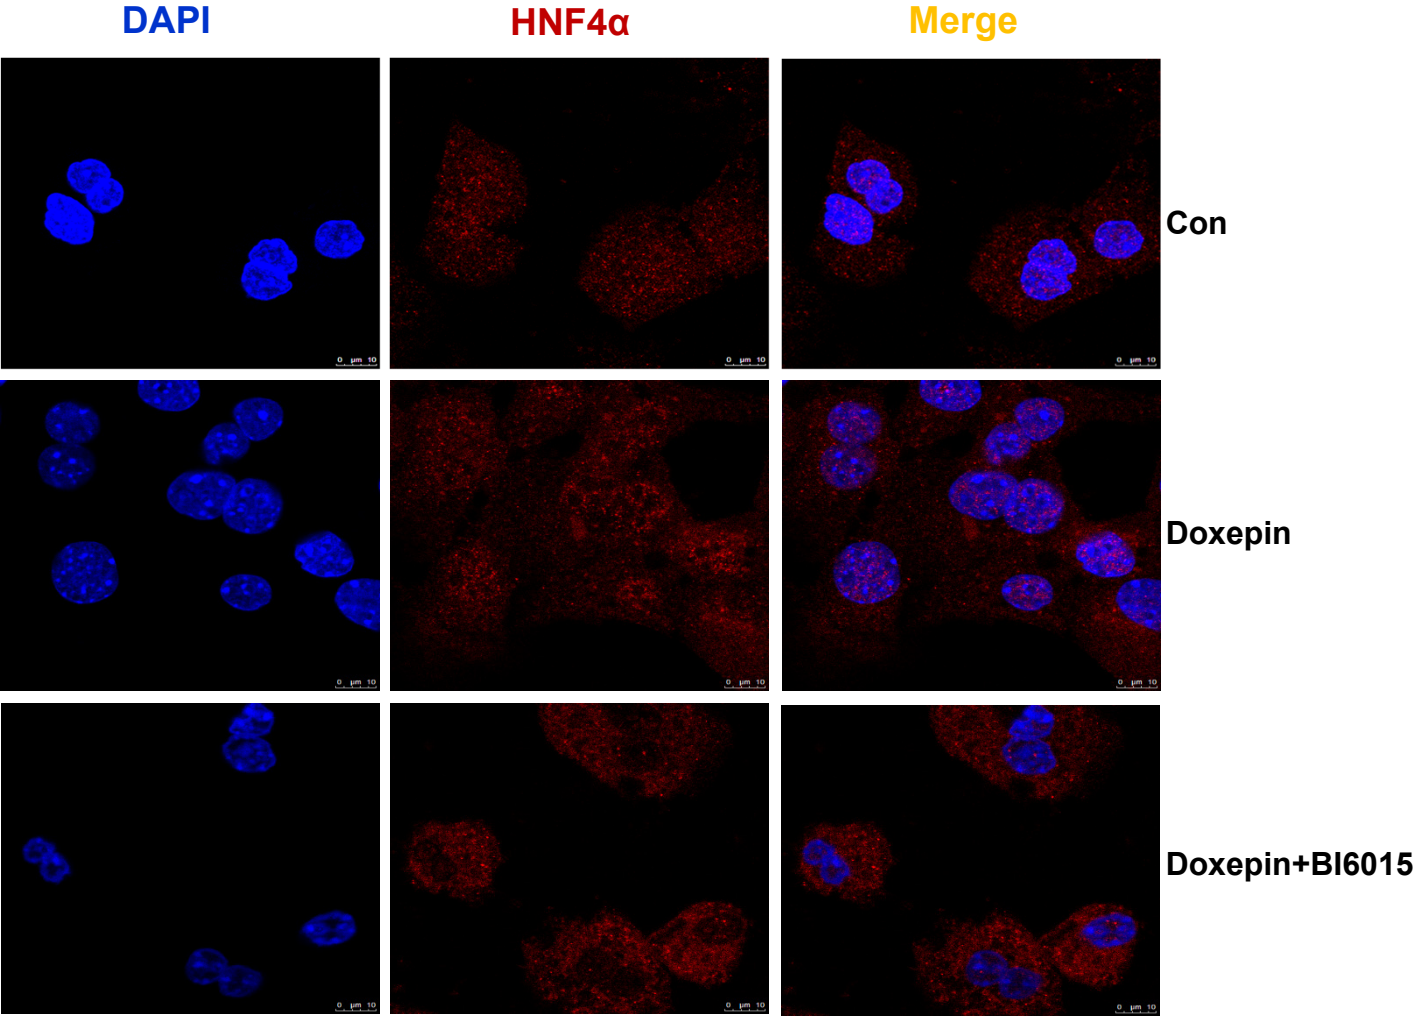

Suppl Figure 12

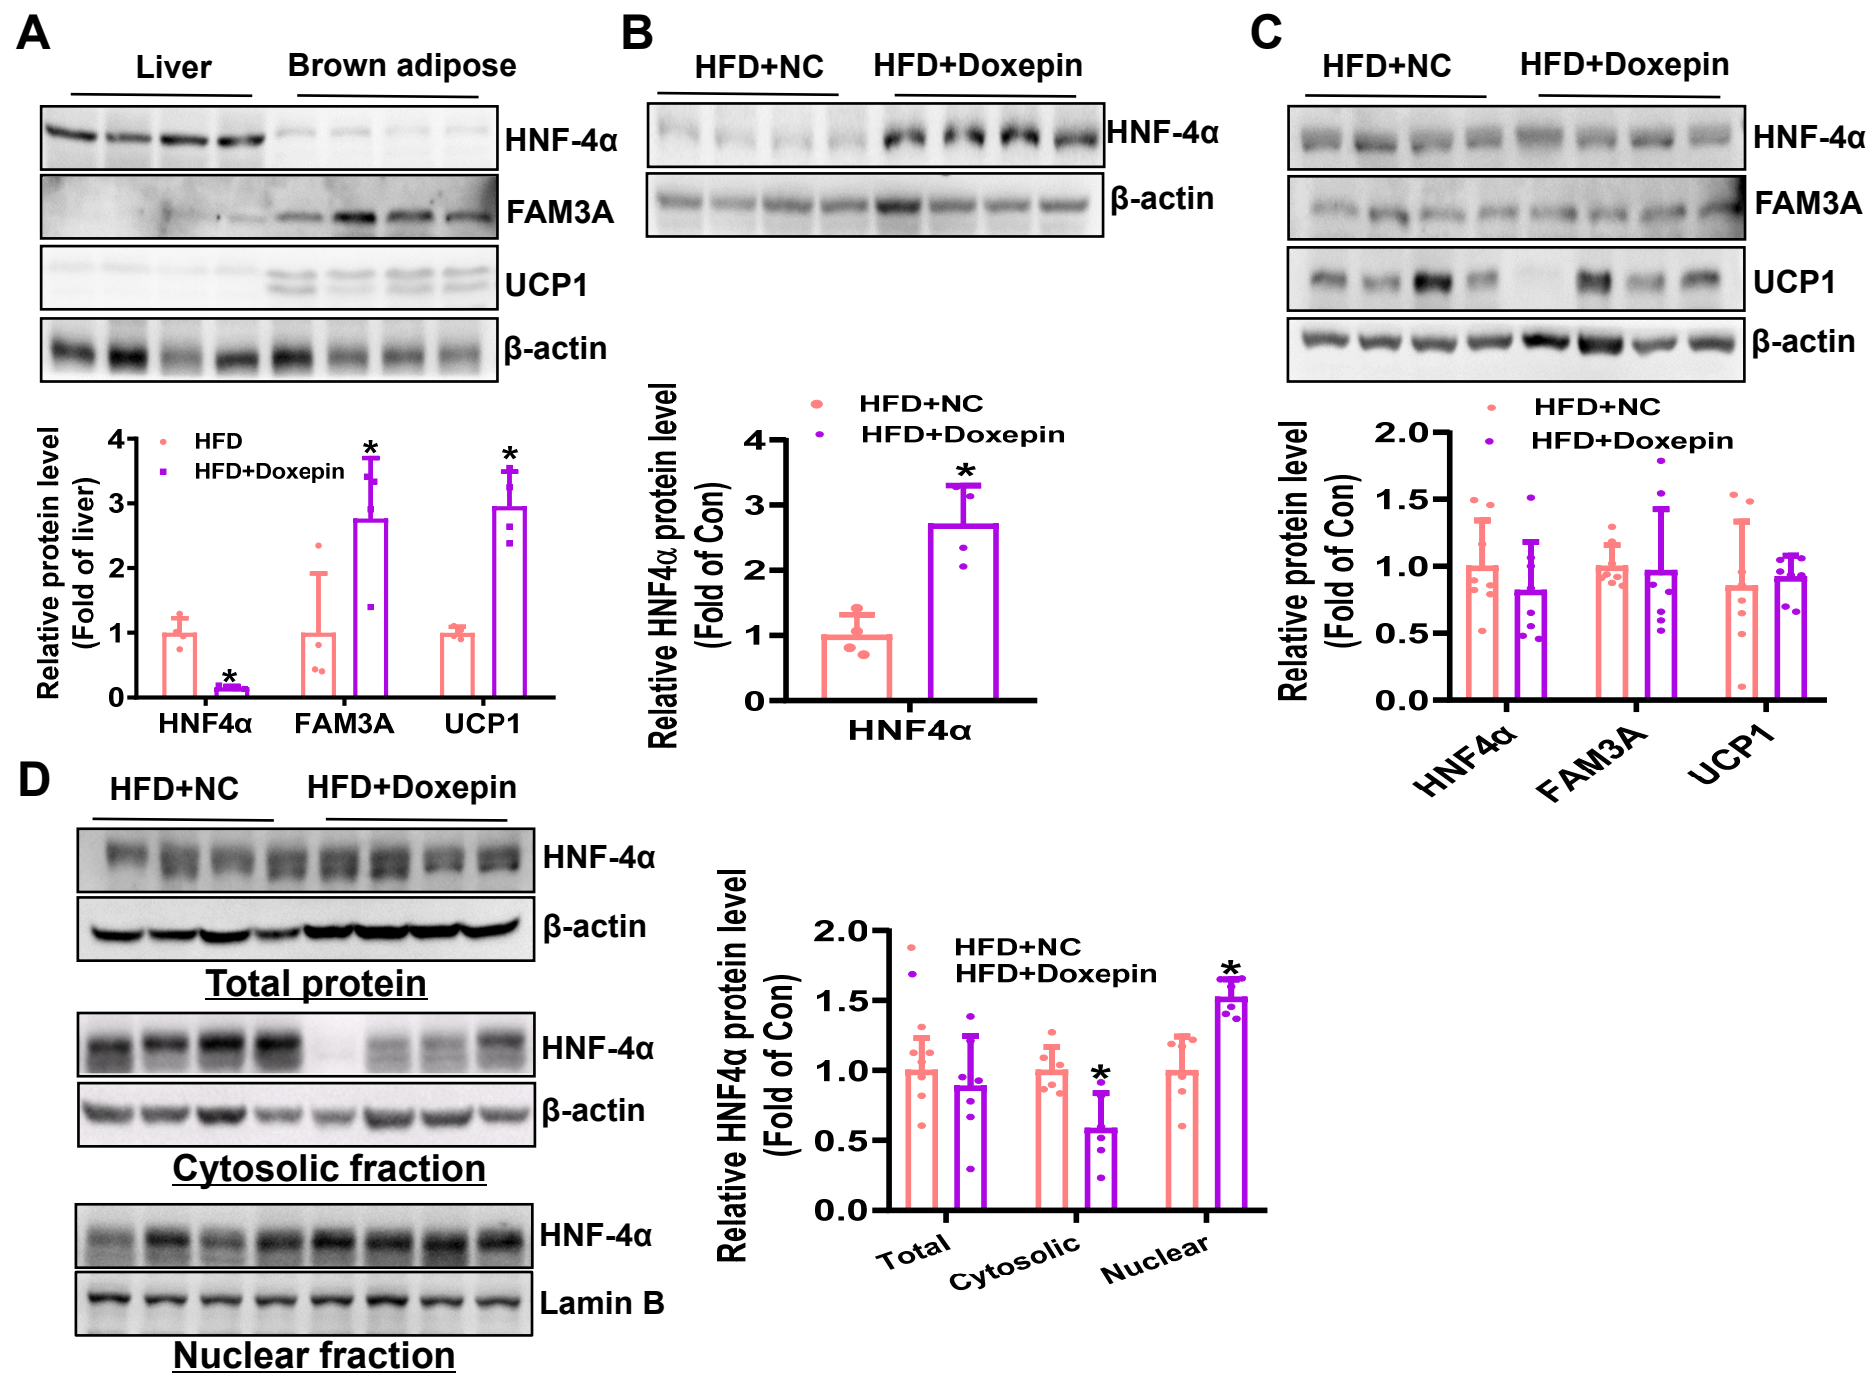

Suppl Figure 13

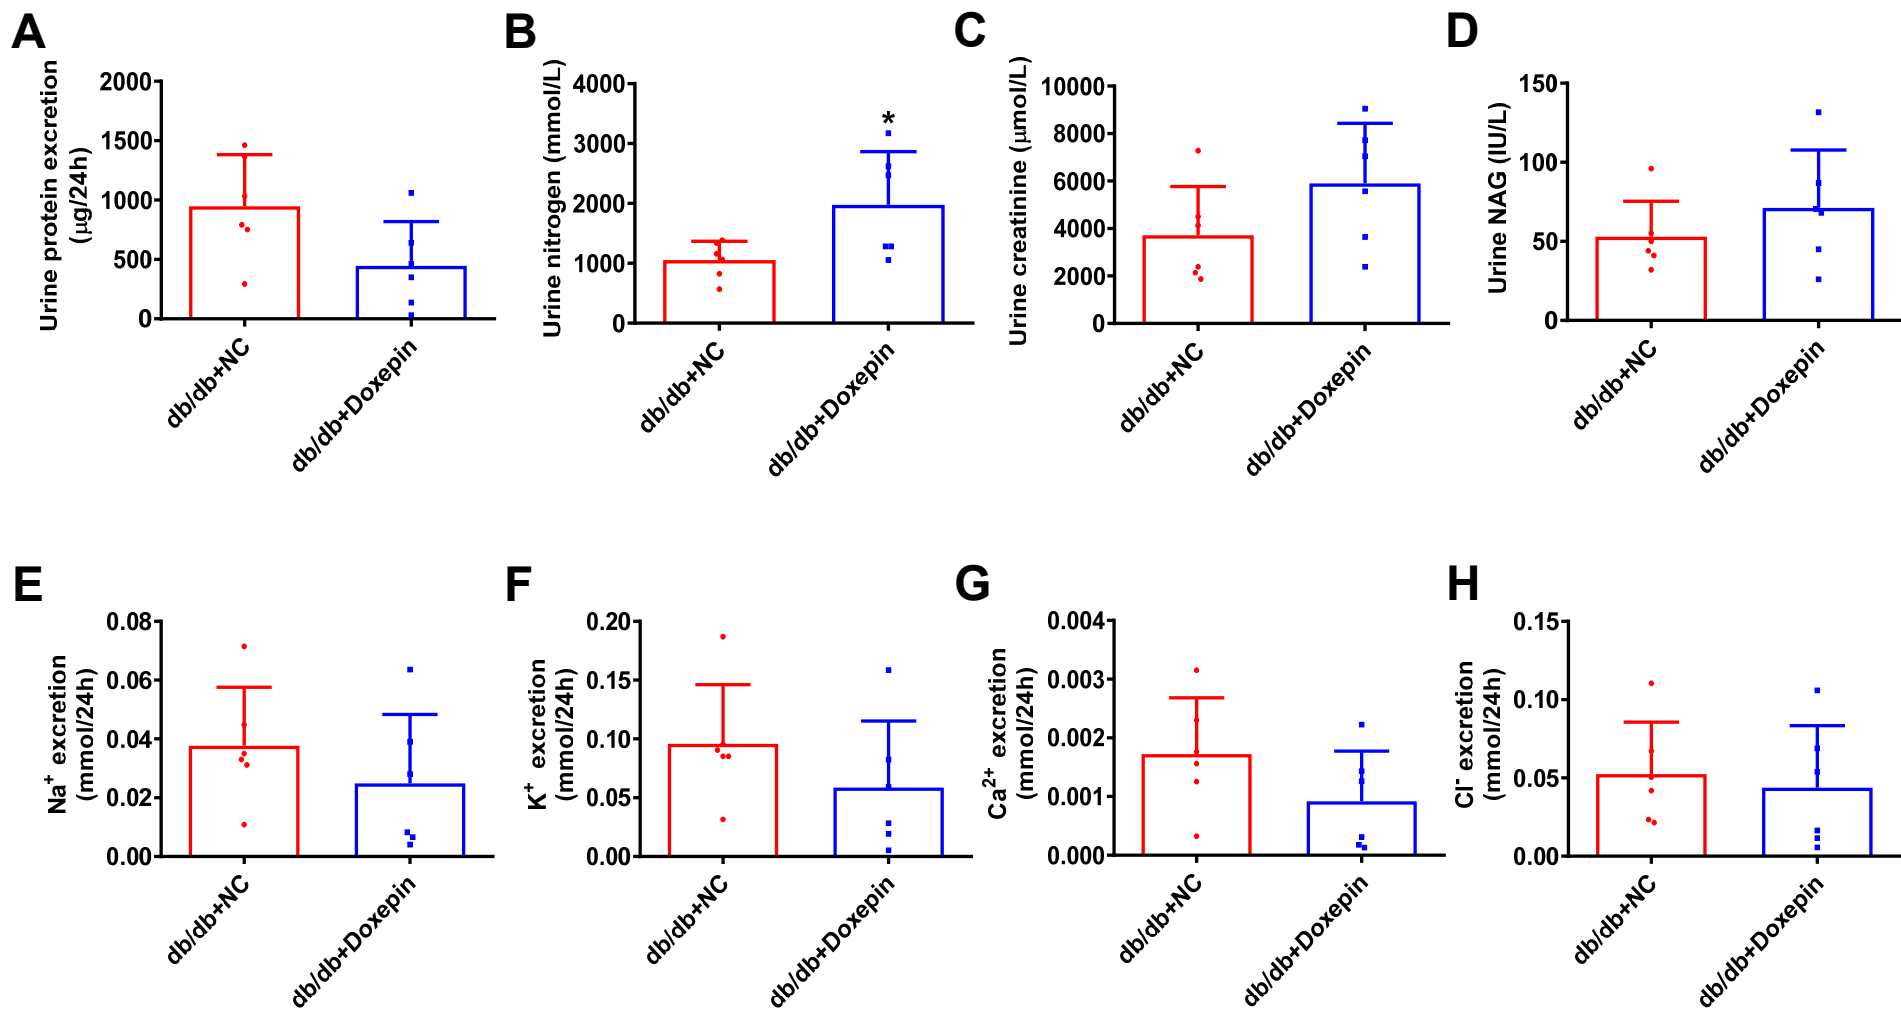

Supplement: Supplementary file 1 [file 1]
